# Supplementary material for: Thermoregulatory elasticity braided fibers designed with core–sheath structure for wearable personal thermal management
Source: Royal Society of Chemistry journal article supplement (doi:10.1039/d4tc00327f), 2024-01-01
Supplement: d4tc00327f1.pdf [file d4tc00327f1.pdf]

## Supporting Information

### **Thermoregulatory elasticity braided fibers designed with core-sheath structure for wearable personal thermal management**

Chengcheng Wang,<sup>a</sup> Jingwen Wang,<sup>a</sup> Liping Zhang,<sup>\*a</sup> and Shaohai Fu<sup>a</sup>

<sup>a</sup> Jiangsu Engineering Research Center for Digital Textile Inkjet Printing, Key Laboratory of Eco-Textile, Jiangnan University, Ministry of Education, Wuxi, Jiangsu 214122, China.

\*E-mail: zhanglp@jiangnan.edu.cn

## Supplementary Methods

### 1. Characterization

The apparent morphology of the aerogel was characterized by a scanning electron microscopy (SEM, SU1510, Hitachi, Co., Ltd, Japan). The lamellar structure of MXene was observed by transmission electron microscope equipment (TEM, Hitachi JEM-2100). RT-IR spectra was measured by Nicolet 6700 spectrometer (Nicolet Instrument Company, Madison, WI, USA). The functional group was determined using a thermo ESCALAB 250Xi instrument equipped with a monochromatic Al K $\alpha$  (15 kV 5 mA) anode X-ray gun (XPS). The universal testing machine (UTM2203) equipped with a 100 N load cell was used to the compression test. The freezing-drying was carried out via the SCIENTZ-10 N freeze dryer (NingBo Scientz Biotechnology Co., Ltd, China). The color parameters of smart fabrics were obtained by computer color matching instrument (Datacolor DC850, America).

## Supplementary Figures

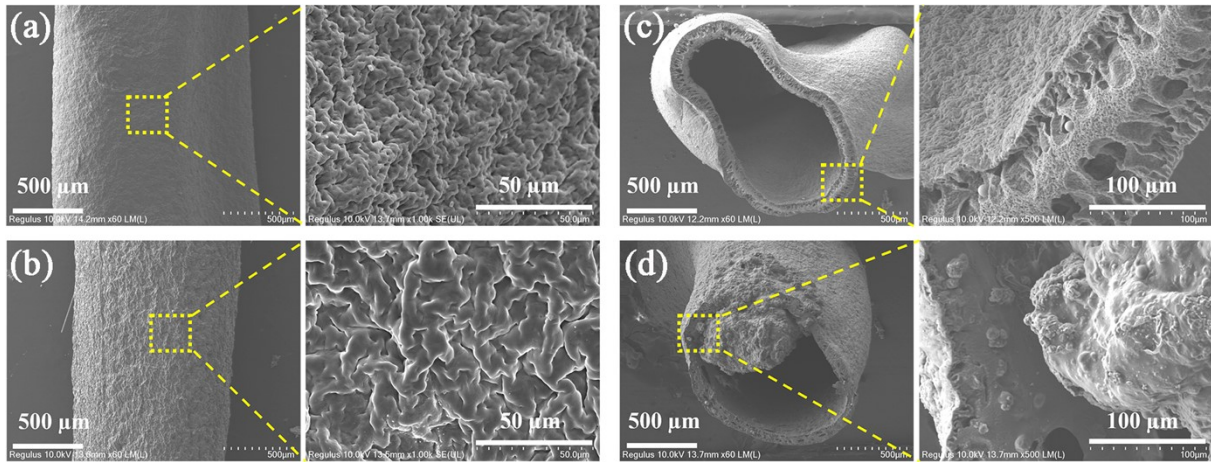

**Fig. S1** Surface morphologies and partial enlarged detail of (a) PU, and (b) PU@GA. Cross-section morphologies of (c) PU, and (d) PU@GA.

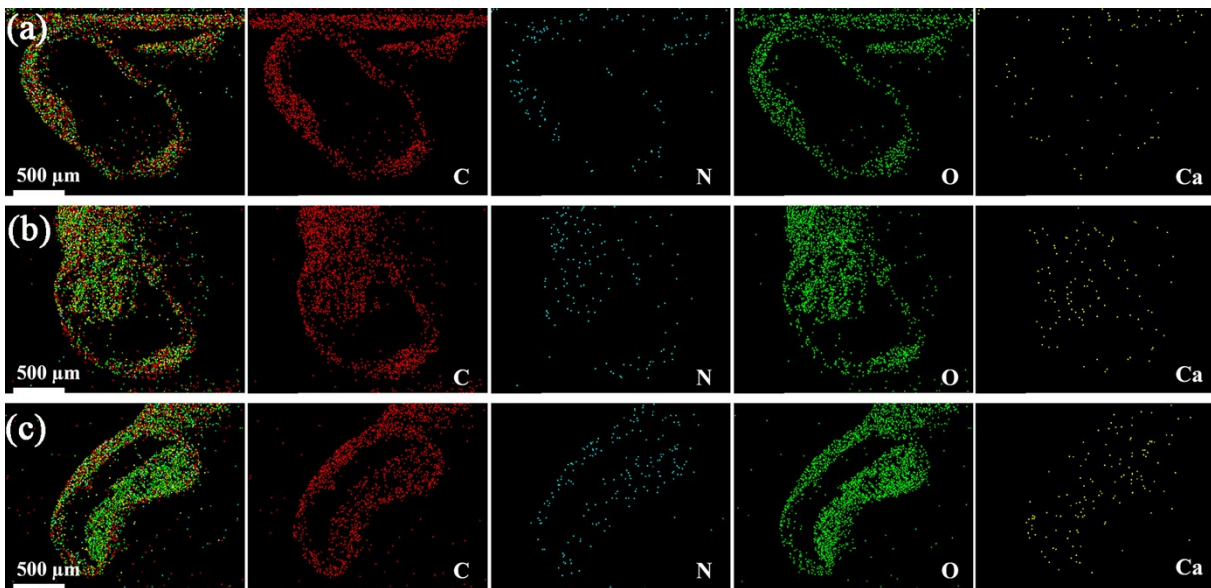

**Fig. S2** EDS-mapping images of (a) PU, (b) PU@GA, and (c) PU@GA@Ms.

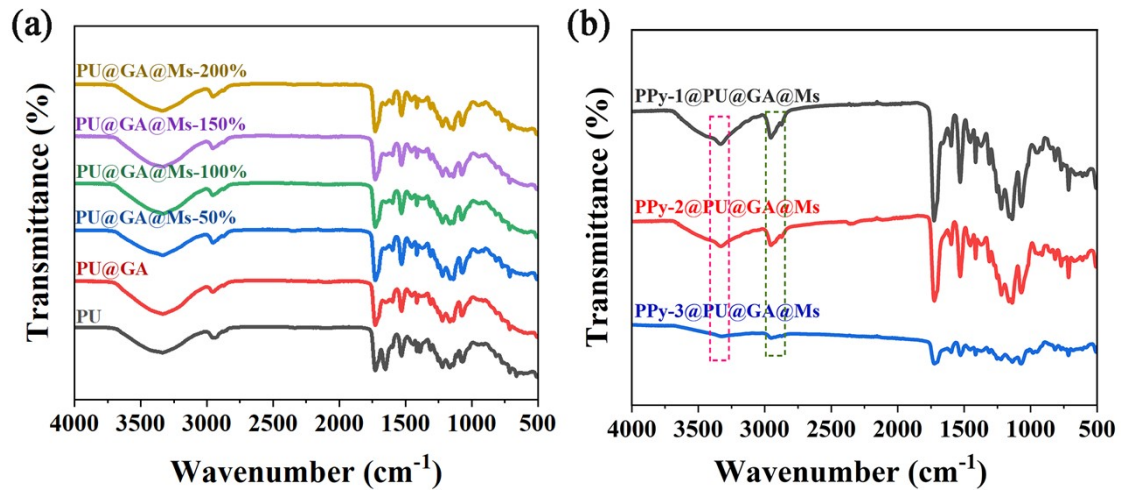

**Fig. S3** FTIR spectra of PU, PU@GA, PU@GA@Ms, and PPy@PU@GA@Ms.

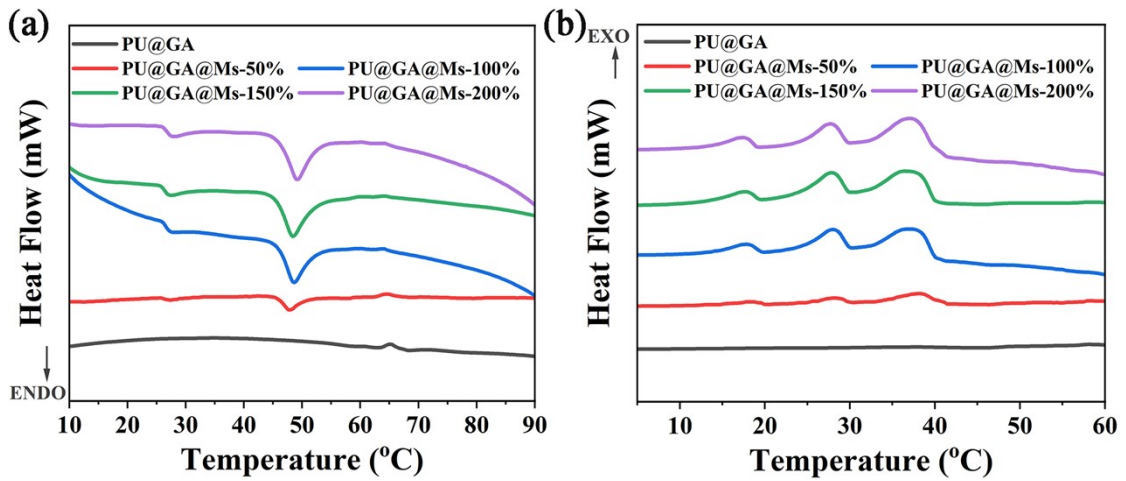

**Fig. S4** DSC curves of PU@GA and PU@GA@Ms-50%~200%.

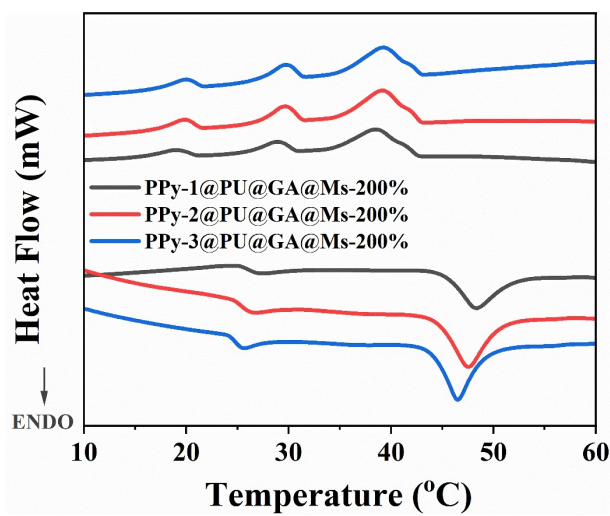

**Fig. S5** DSC curves of PPy@PU@GA@Ms in heating and cooling processes.

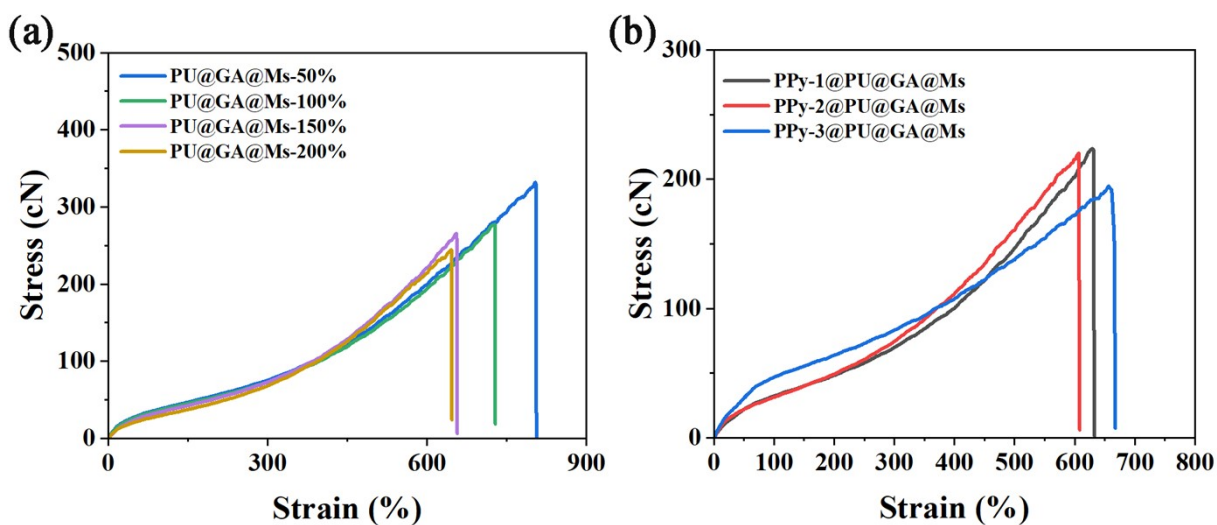

Fig. S6 Strain-stress curves of (a) PU@GA@Ms, and (b) PPy@PU@GA@Ms.

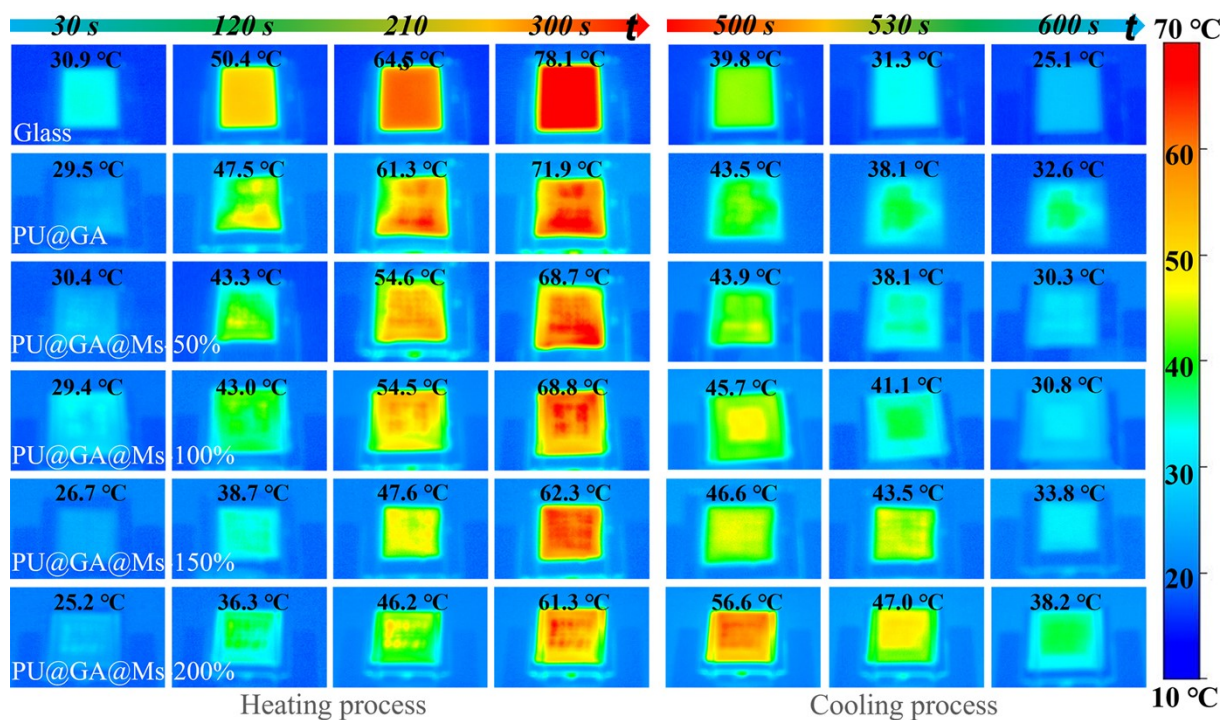

Fig. S7 IR thermal images of the pure glass sheet, PU@GA and PU@GA@Ms in the heating and cooling processes.

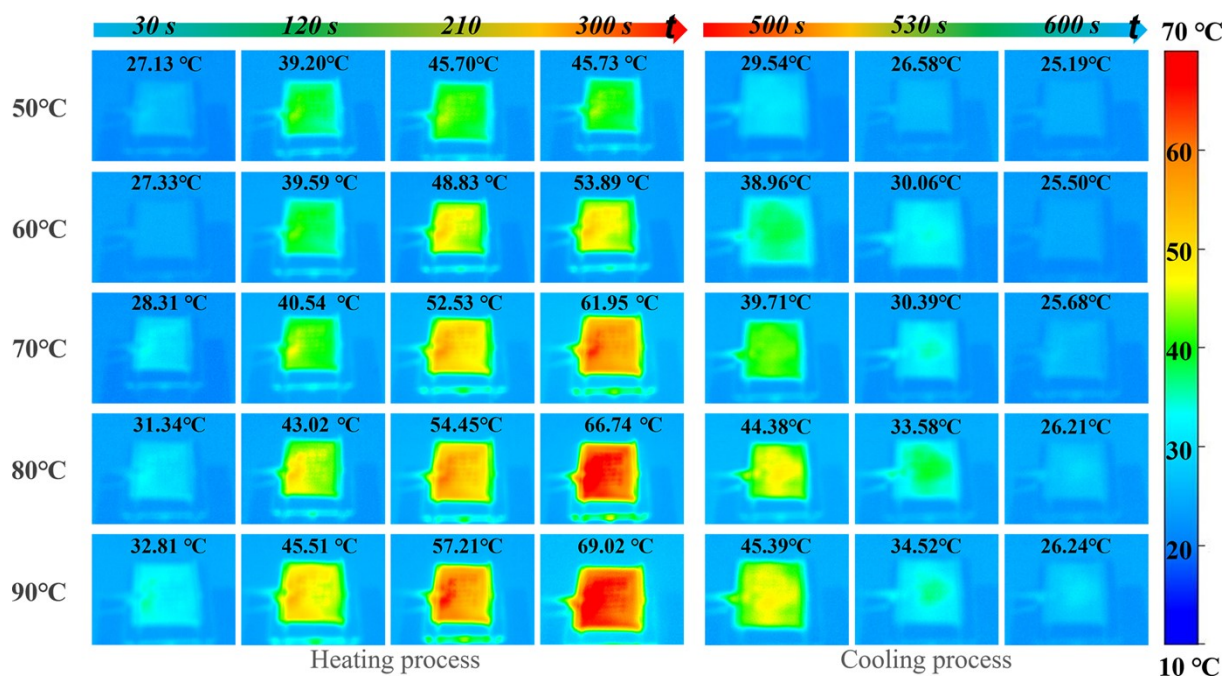

**Fig. S8** IR thermal images of PU@GA@Ms-200% at different initial heating temperature and natural cooling processes.

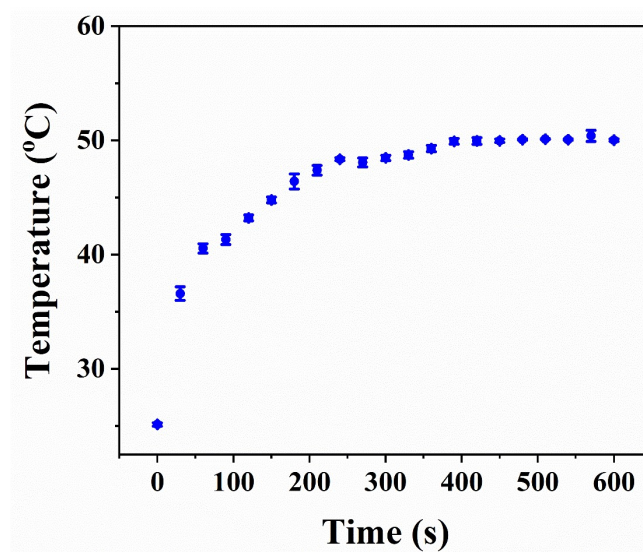

**Fig. S9** Surface temperature variation of PPy-3@PU@GA@Ms under  $1000 \text{ W}\cdot\text{m}^{-2}$  with different irradiation time.

## Supplementary Tables

Table S1 The thermal data and enthalpy of MPCM and fibers

| Samples             | $T_m$ (°C) | $T_c$ (°C) | $\Delta H_m$ (J/g) | $\Delta H_c$ (J/g) |
|---------------------|------------|------------|--------------------|--------------------|
| PU@GA               | --         | --         | 0                  | 0                  |
| MPCM                | 47.45      | 39.60      | 88.01              | 95.14              |
| PU@GA@Ms-50%        | 47.78      | 38.23      | 31.07              | 31.18              |
| PU@GA@Ms-100%       | 48.61      | 37.60      | 32.42              | 32.77              |
| PU@GA@Ms-150%       | 48.39      | 37.35      | 33.28              | 33.23              |
| PU@GA@Ms-200%       | 49.05      | 37.33      | 35.10              | 34.78              |
| PPy-1@PU@GA@Ms-200% | 47.74      | 38.65      | 34.67              | 35.06              |
| PPy-2@PU@GA@Ms-200% | 47.57      | 39.18      | 35.58              | 35.17              |
| PPy-3@PU@GA@Ms-200% | 46.01      | 39.18      | 37.15              | 36.60              |

Table S2 Electrical conductivity of the PPy@PU@GA@Ms fiber

|               | PPy-1@PU@GA@Ms<br>(KΩ/cm) | PPy-2@PU@GA@Ms<br>(KΩ/cm) | PPy-3@PU@GA@Ms<br>(KΩ/cm) |
|---------------|---------------------------|---------------------------|---------------------------|
| 1             | 19.4                      | 11.3                      | 10.4                      |
| 2             | 17.4                      | 12.5                      | 9.6                       |
| 3             | 18.8                      | 10.8                      | 10.2                      |
| Average value | 18.5                      | 11.5                      | 10.1                      |

Table S3 The comparison of photothermal conversion performance of fibers

| Materials                | Saturation<br>Temperature (°C)<br>1000 W·m <sup>-2</sup> | Strain (%) | Morphology            | Ref       |
|--------------------------|----------------------------------------------------------|------------|-----------------------|-----------|
| PU/PPy/ZrC               | 55.8                                                     | 150%       | Coaxial wet spinning  | S1        |
| PW@PU@CNTs@PEDOT:<br>PSS | 70.5                                                     | 264        | Fibrous membrane      | S2        |
| PW@PDVB-12/PPy           | 47                                                       | --         | --                    | S3        |
| SF/CA                    | 45                                                       | --         | Silk Fiber            | S4        |
| AgNPs@PDA@PU@PW          | 63.2                                                     | --         | Fibrous membrane      | S5        |
| PPy-PU/ZrC               | 78                                                       | 291.57     | Fibrous membrane      | S6        |
| PU/MXene@OD              | 65.3                                                     | --         | Fiber                 | S7        |
| PEG-PU-CNT               | --                                                       | 6          | Composite<br>membrane | S8        |
| BPBBT CS-3               | 56.1                                                     | --         | Fibrous membrane      | S9        |
| PPy@PU@GA@Ms             | 50.1                                                     | 660        | Fiber                 | This work |

## Reference

- S1. Q. Yan, X. Du, Y. Liu, X. Zhou and B. Xin, *ACS Applied Materials & Interfaces*, 2022, **14**, 24820-24831.
- S2. J. Wu, M. Wang, L. Dong, J. Shi, M. Ohyama, Y. Kohsaka, C. Zhu and H. Morikawa, *ACS Nano*, 2022, **16**, 12801-12812.
- S3. L. Kong, Z. Wang, X. Kong, L. Wang, Z. Ji, X. Wang and X. Zhang, *ACS Applied Materials & Interfaces*, 2021, **13**, 29965-29974.
- S4. C. Wang, H. Dong, C. Cheng, K. Sun, T. Jin and Q. Shi, *ACS Sustainable Chemistry & Engineering*, 2022, **10**, 16368-16376.
- S5. J. Wu, M. Wang, L. Dong, Y. Zhang, J. Shi, M. Ohyama, Y. Kohsaka, C. Zhu and H. Morikawa, *Chemical Engineering Journal*, 2023, **465**, 142835.
- S6. Q. Yan, B. Xin, Z. Chen and Y. Liu, *Materials Today Communications*, 2021, **28**, 102584.
- S7. J. Zhang, Y. Zhang, S. Wu, Y. Ji, Z. Mao, D. Wang, Z. Xu, Q. Wei and Q. Feng, *Chemical Engineering Journal*, 2024, **483**, 149281.
- S8. J. Shi, W. Aftab, Z. Liang, K. Yuan, M. Maqbool, H. Jiang, F. Xiong, M. Qin, S. Gao and R. Zou, *Journal of Materials Chemistry A*, 2020, **8**, 20133-20140.
- S9. H. Li, H. Wen, Z. Zhang, N. Song, R. T. K. Kwok, J. W. Y. Lam, L. Wang, D. Wang and B. Z. Tang, *Angewandte Chemie International Edition*, 2020, **59**, 20371-20375.
